# Supplementary material
Source: PubMed Central journal article supplement (PMC4525874)
Supplement: ijcep0008-6589-f3.pdf [file ijcep0008-6589-f3.pdf]

# Prognostic value of PROM1

## Supplementary 1: ROC analysis

(1) Cutoff-value of cytoplasmic staining:

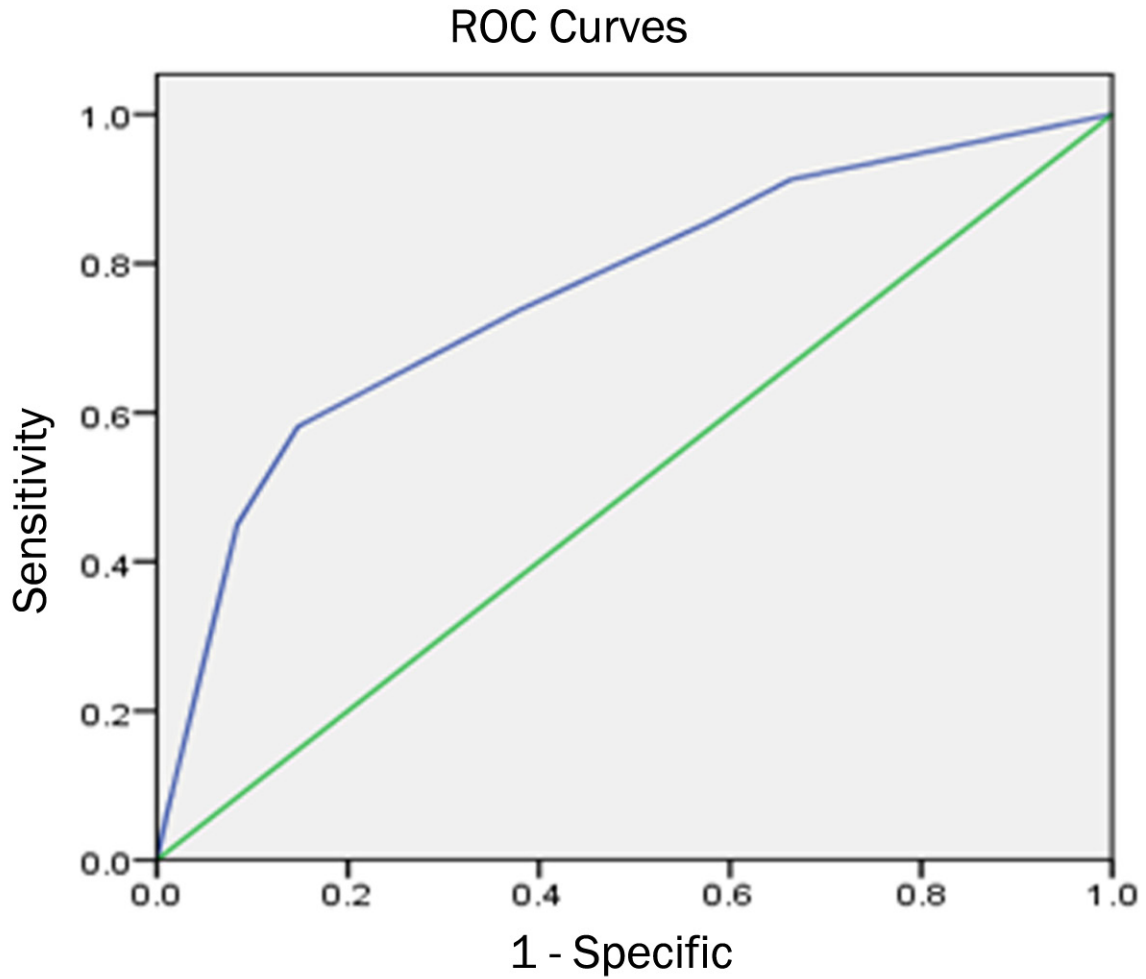

| Cut-off point | Cut-off value | Sensitivity | Specificity | Youden's Index |
|---------------|---------------|-------------|-------------|----------------|
| 1             | 0.5           | 0.913       | 0.663       | 0.250          |
| 2             | 1.5           | 0.856       | 0.579       | 0.277          |
| 3             | 2.5           | 0.738       | 0.379       | 0.359          |
| 4             | 3.5*          | 0.581       | 0.147       | 0.434          |
| 5             | 5             | 0.450       | 0.084       | 0.366          |
| 6             | 7.5           | 0.063       | 0.011       | 0.052          |

Youden's Index = true positive/(true positives + false negatives) - false positive/(false positive + true negative); \*Indicates that the cut-off point corresponding the largest value of Youden's index.

## Prognostic value of PROM1

(2) Cutoff-value of membrane staining:

### ROC Curves

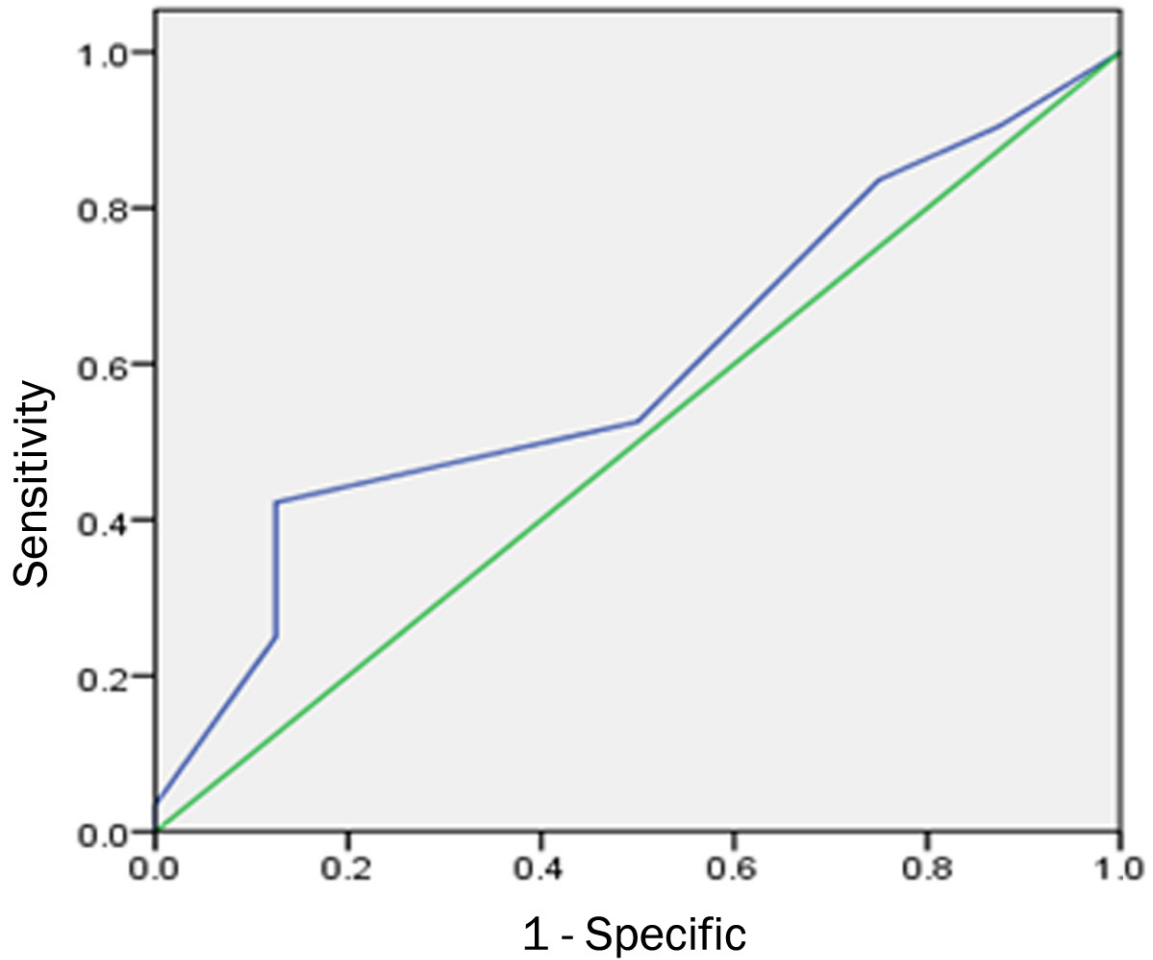

| Cut-off point | Cut-off value | Sensitivity | Specificity | Youden's Index |
|---------------|---------------|-------------|-------------|----------------|
| 1             | 0.5           | 0.905       | 0.875       | 0.030          |
| 2             | 1.5           | 0.836       | 0.750       | 0.086          |
| 3             | 2.5           | 0.526       | 0.500       | 0.026          |
| 4             | 3.5*          | 0.422       | 0.125       | 0.297          |
| 5             | 5             | 0.250       | 0.000       | 0.250          |
| 6             | 7.5           | 0.034       | 0.011       | 0.023          |

Youden's Index = true positive/(true positives + false negatives) - false positive/(false positive + true negative); \*Indicates that the cut-off point corresponding the largest value of Youden's index.

## Prognostic value of PROM1

(3) Cutoff-value of nuclear staining:

### ROC Curves

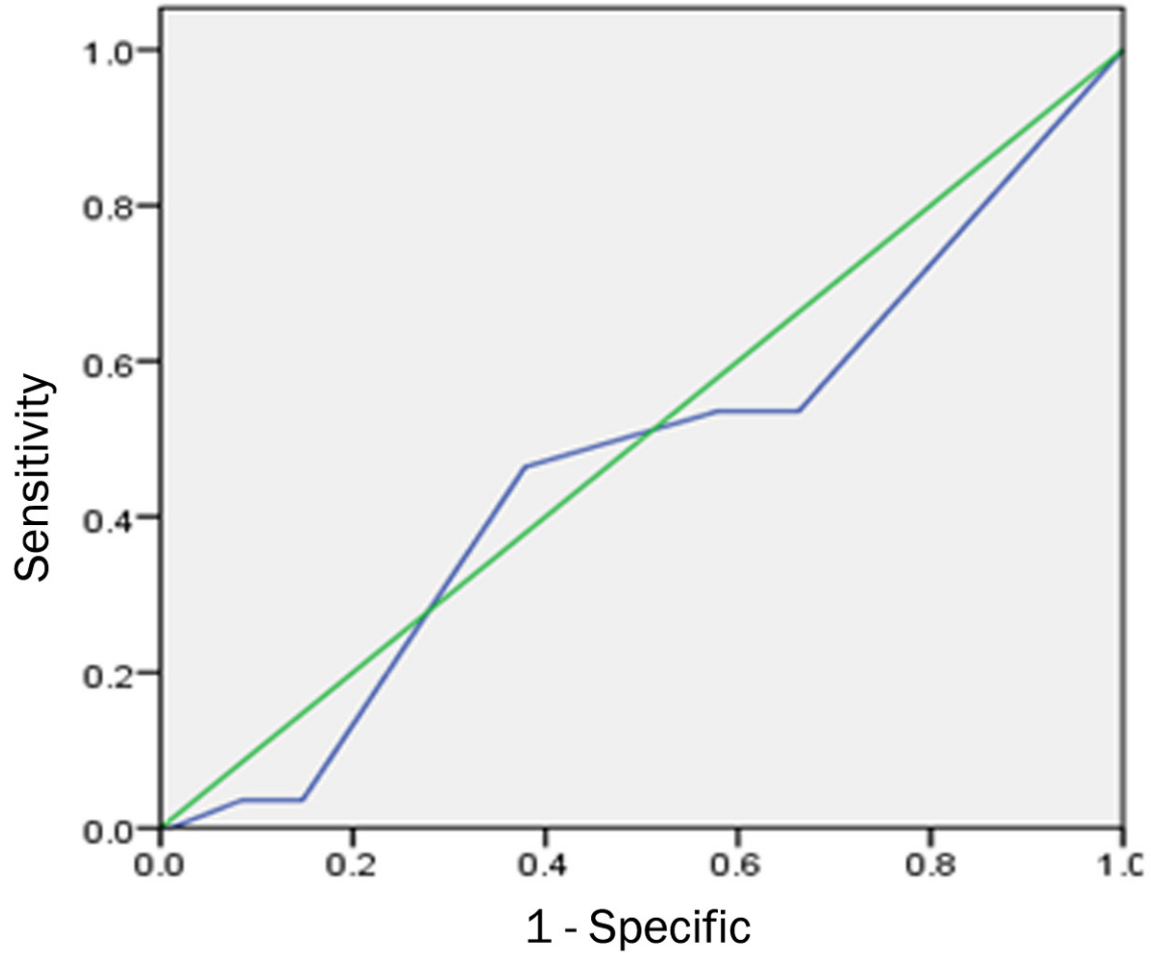

| Cut-off point | Cut-off value | Sensitivity | Specificity | Youden's Index |
|---------------|---------------|-------------|-------------|----------------|
| 1             | 0.5           | 0.536       | 0.663       | -0.127         |
| 2             | 1.5           | 0.536       | 0.579       | -0.043         |
| 3             | <b>2.5*</b>   | 0.464       | 0.379       | 0.085          |
| 4             | 3.5           | 0.036       | 0.147       | -0.111         |
| 5             | 5             | 0.036       | 0.084       | -0.048         |
| 6             | 7.5           | 0.000       | 0.011       | -0.011         |

Youden's Index = true positive/(true positives + false negatives) - false positive/(false positive + true negative); \*Indicates that the cut-off point corresponding the largest value of Youden's index.

## Prognostic value of PROM1

### Supplementary 2: Multivariate Survival Analysis (Cox Regression Model)

| Variants            | HR    | 95% CI       | P value                       |
|---------------------|-------|--------------|-------------------------------|
| Lymph Node Invasion | 9.709 | 1.805-52.632 | <b>0.008<sup>a</sup></b>      |
| Clinical Stage      | 1.217 | 0.399-3.704  | 0.730                         |
| Membrane expression | 3.774 | 2.374-6.061  | <b>&lt; 0.001<sup>a</sup></b> |

HR, hazard ratio; CI, confidence interval; <sup>a</sup>Statistically significant.
